# Supplementary material
Source: MDPI journal article supplement (https://www.mdpi.com/1996-1073/14/19/6268)
Supplement: s1 [file s1]

**Management of dark fermentation broth via biorefining and photo fermentation**

**Karolina Kucharska <sup>1\*</sup>, Patrycja Makoś-Chelstowska <sup>1</sup>, Edyta Słupek <sup>1</sup> and Jacek Gębicki <sup>1</sup>**

<sup>1</sup>Department of Process Engineering and Chemical Technology, Faculty of Chemistry, Gdansk University of Technology, G. Narutowicza St. 11/12, 80-233 Gdańsk, Poland; edyta.slupek@pg.edu.pl (E.S.); jacek.gebicki@pg.edu.pl (J.G.)

\* Correspondence: karkucha@pg.edu.pl

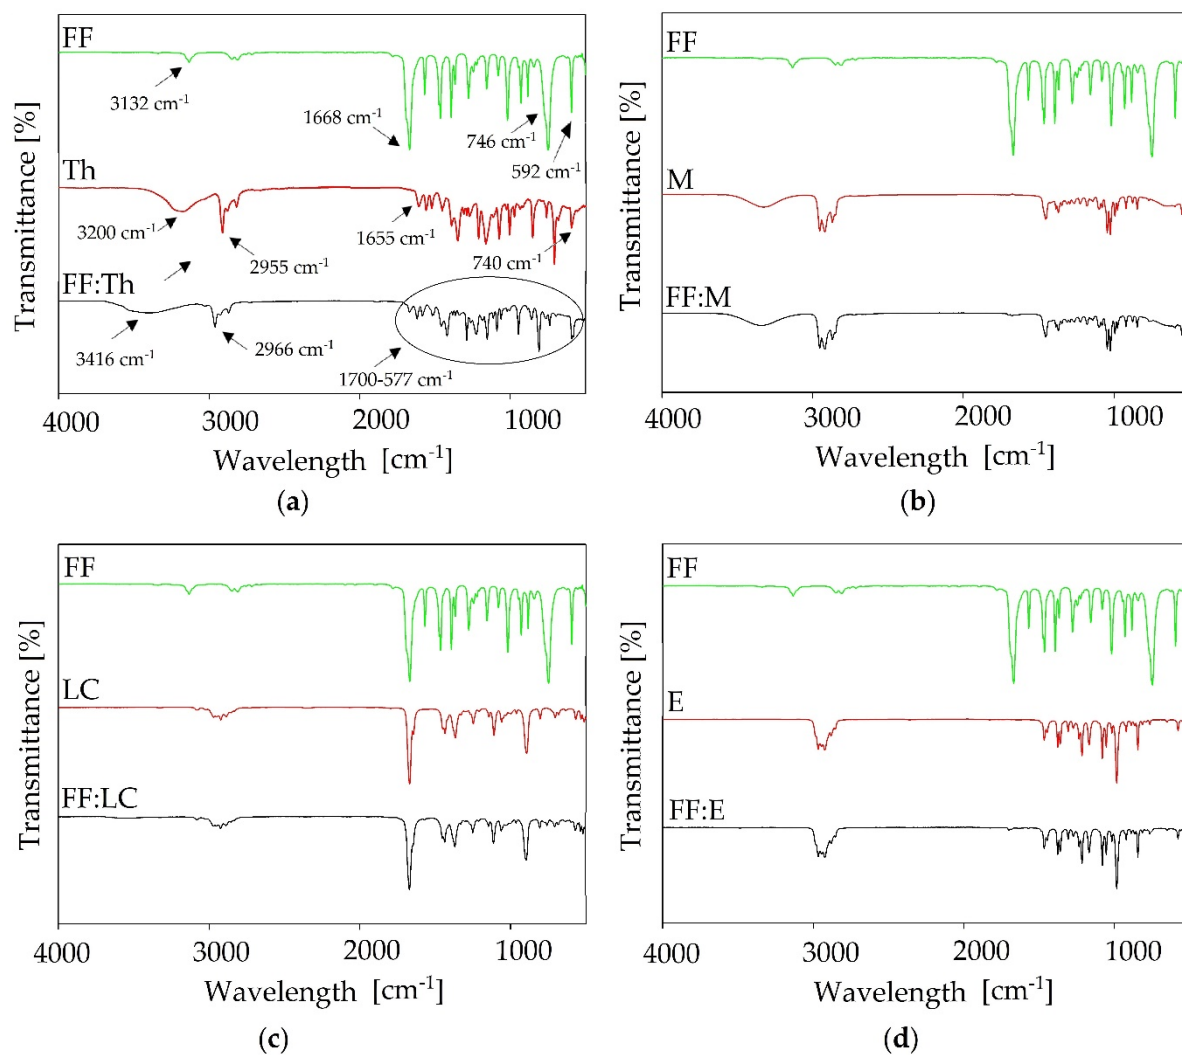

**Figure S1** FT-IR spectrums from optimization of the kind of HBD (a) Th; (b) M; (c) LC; (d) E used for effective removal of FF from the model fermentation broth and simultaneous formation of DES.

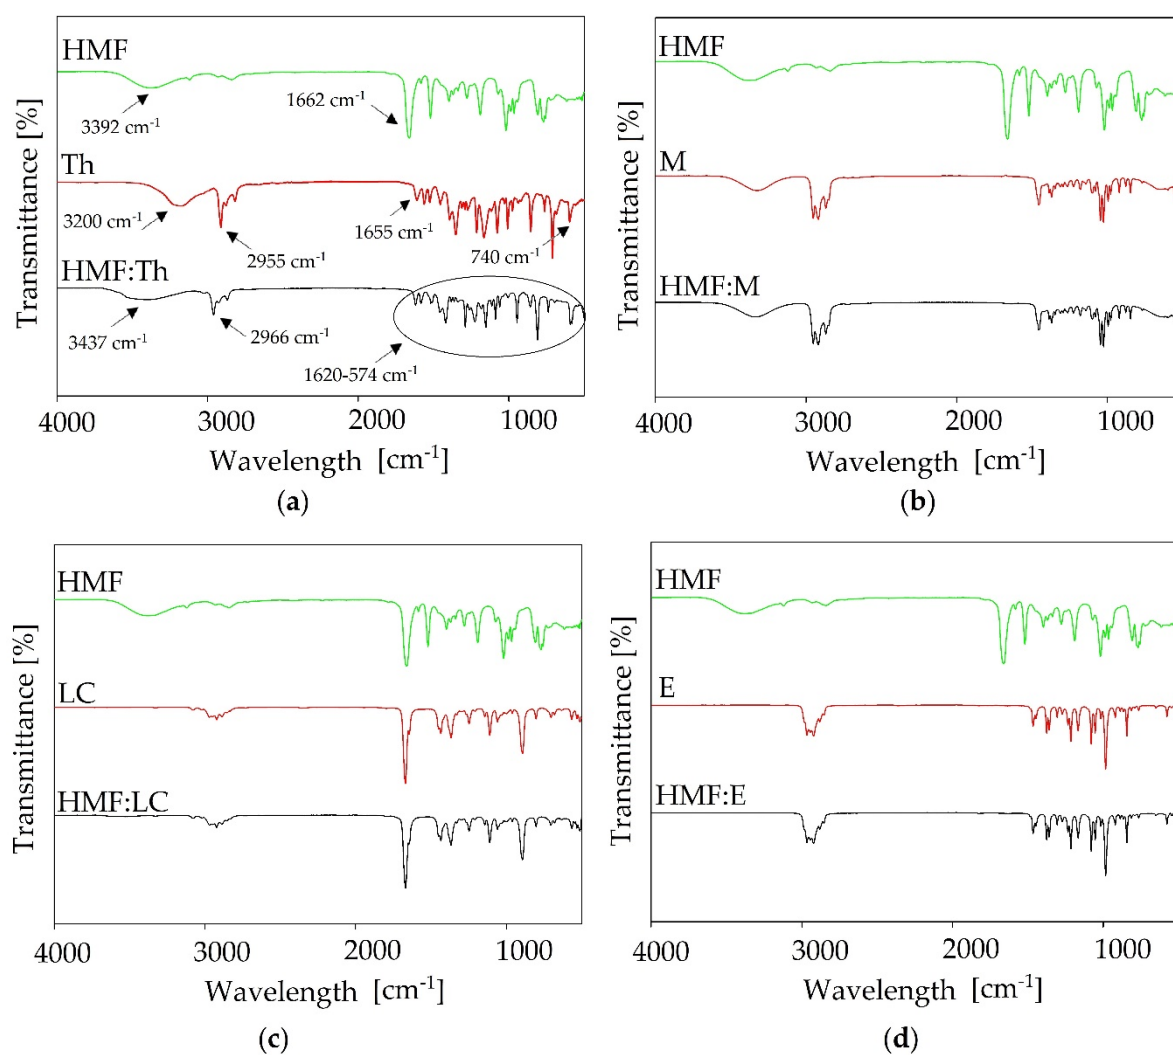

**Figure S2** FT-IR spectrums from optimization of the kind of HBD (a) Th; (b) M; (c) LC; (d) E used for effective removal of HMF from the model fermentation broth and simultaneous formation of DES.

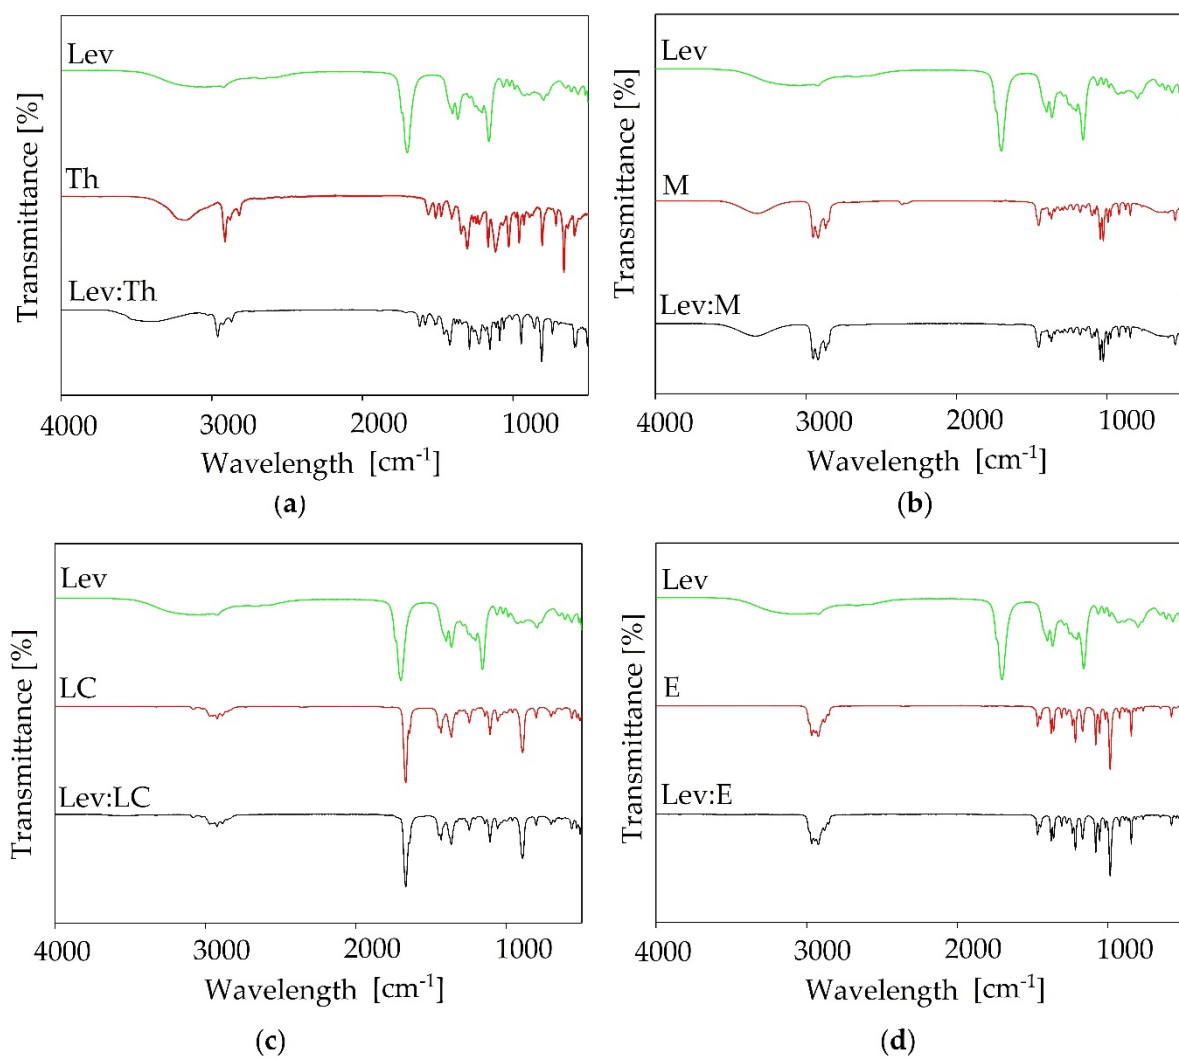

**Figure S3** FT-IR spectrums from optimization of the kind of HBD (a) Th; (b) M; (c) LC; (d) E used for effective removal of Lev from the model fermentation broth and simultaneous formation of DES.

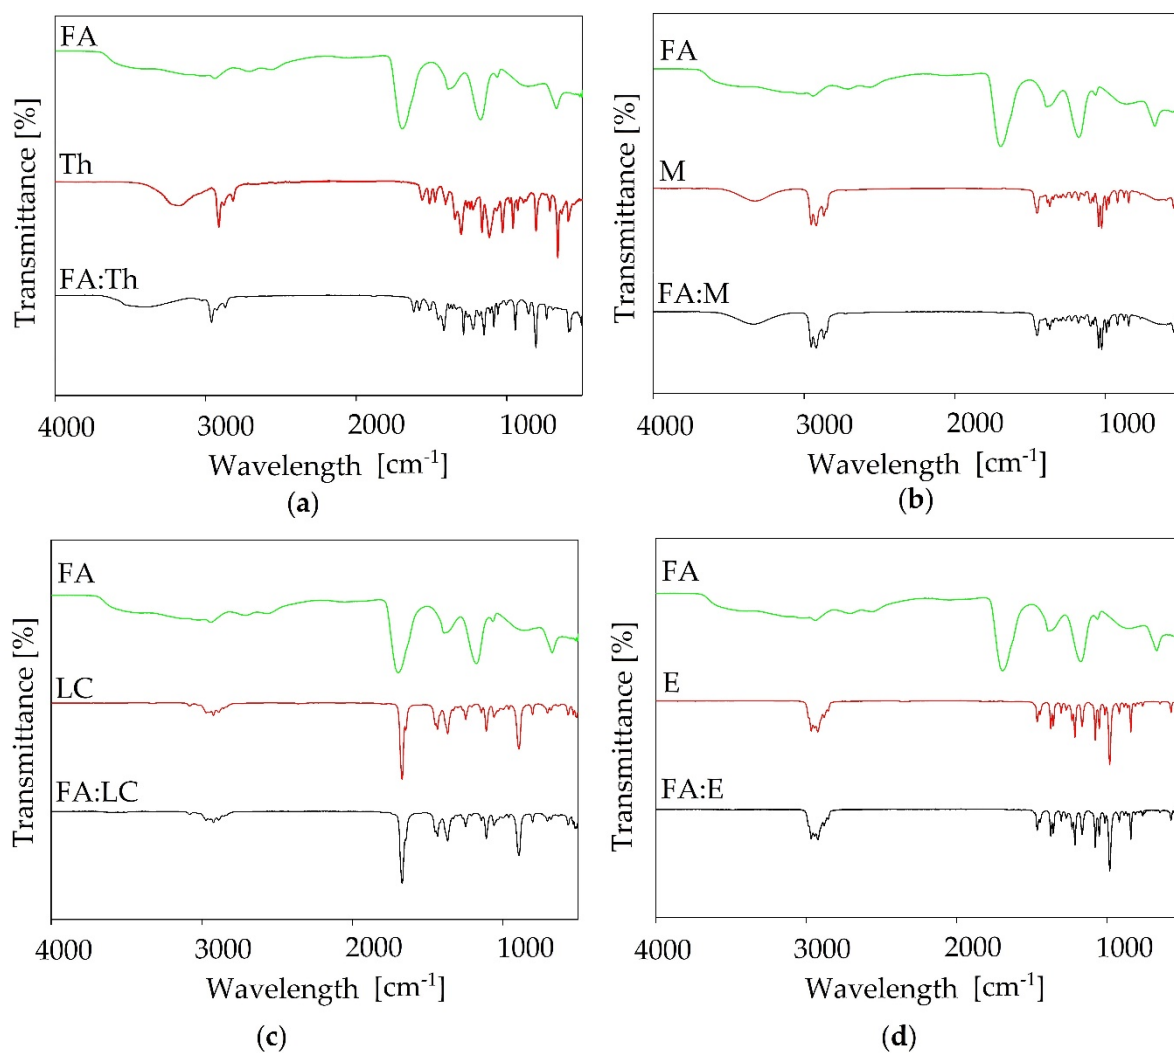

**Figure S4** FT-IR spectrums from optimization of the kind of HBD (a) Th; (b) M; (c) LC; (d) E used for effective removal of FA from the model fermentation broth and simultaneous formation of DES.
